# Supplementary material for: Molecular Interaction of Protein-Pigment C-Phycocyanin with Bovine Serum Albumin in a Gomphosis Structure Inhibiting Amyloid Formation
Source: Int J Mol Sci. 2020 Nov 2;21(21):8207. doi: 10.3390/ijms21218207 (PMC7663302; doi:10.3390/ijms21218207)
Supplement: Supplementary file 1 [file ijms-21-08207-s001.pdf]

# Molecular interaction of protein-pigment C-phycocyanin with bovine serum albumin in a gomphosis structure inhibiting amyloid formation

Yi-Cong Luo and Pu Jing \*

Shanghai Food Safety and Engineering Technology Research Center, Bor S. Luh Food Safety Research Center,  
Key Lab of Urban Agriculture (South), School of Agriculture & Biology, Shanghai Jiao Tong University,  
Shanghai 200240, China

## Contents

|                                                       |   |
|-------------------------------------------------------|---|
| 1.Representative bovine serum albumin CD spectra..... | 2 |
| 2.Detail about molecular docking.....                 | 3 |

## 1. Representative bovine serum albumin CD spectra

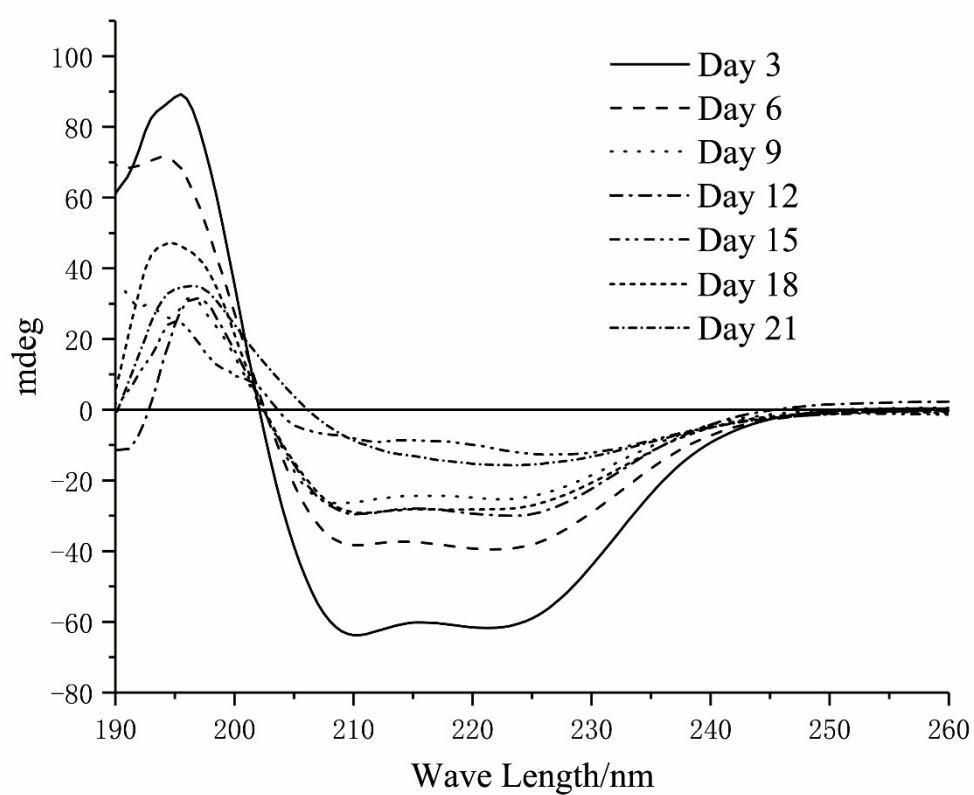

**Figure S1.** CD data of BSA without the existence of C-phycocyanin.

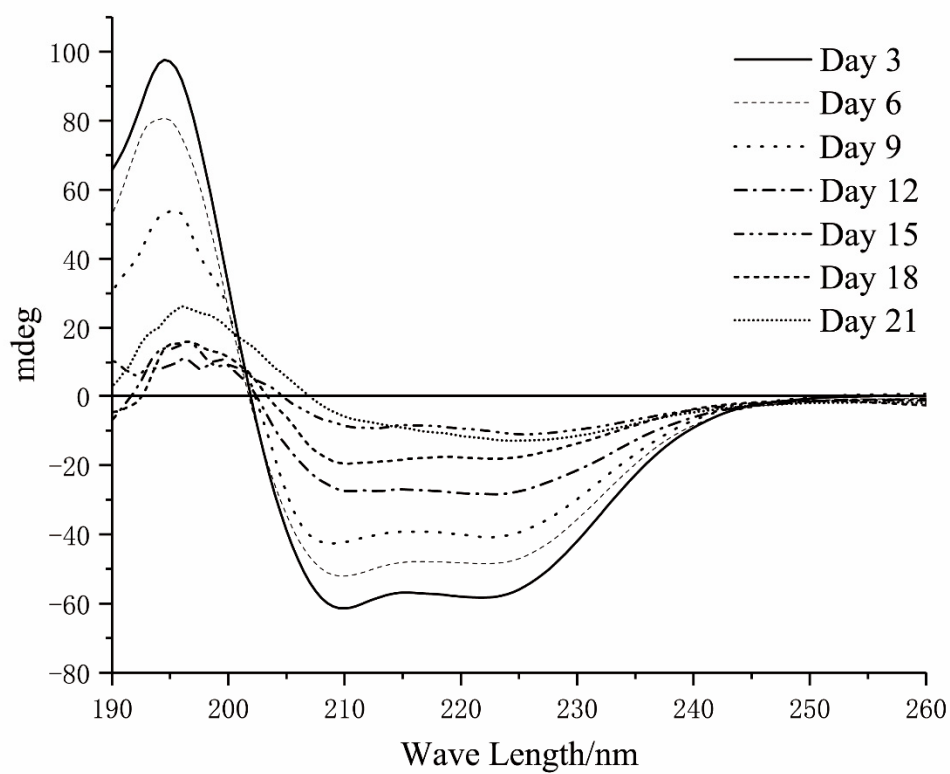

**Figure S2.** CD data of BSA with the existence of C-phycocyanin.

## 2. Detail about molecular docking

### 2.1. Two abandoned models between BSA and monomer of C-phycocyanin

This section provided two models between BSA and monomer of C-phycocyanin that are not selected as our main model due to less interactions and worse combining models.

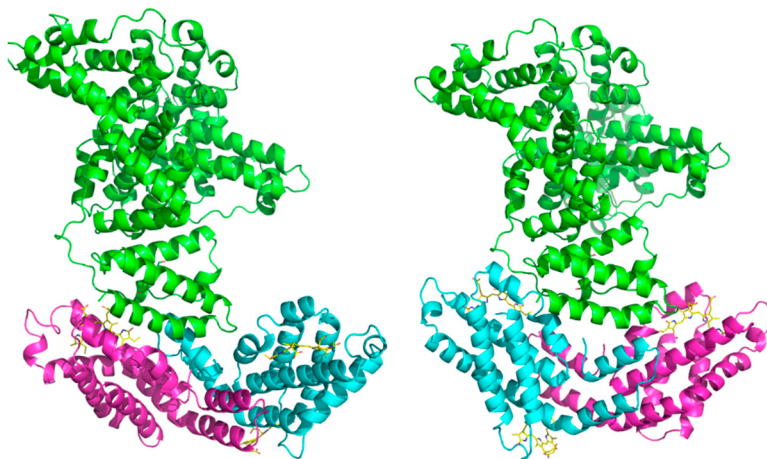

**Figure S3.** Two models between BSA and monomer of C-phycocyanin with less interactions.

### 2.2. One example model between BSA and trimer or hexamer of C-phycocyanin

Molecular model between BSA and trimer or hexamer of C-phycocyanin seemed impossible. Not only because our system was very dilute (less than 1mg/mL), but the molecular docking results suggested that compared with monomer, trimer, and hexamer of C-phycocyanin interacted much worse with BSA. The main U-shaped cavity was hidden by other C-phycocyanin and thus BSA failed to attach C-phycocyanin more tightly. In fact, trimer and hexamer of C-phycocyanin possessed a small hole that BSA was too large to enter in, yet some other small molecules or protein may fit this hole.

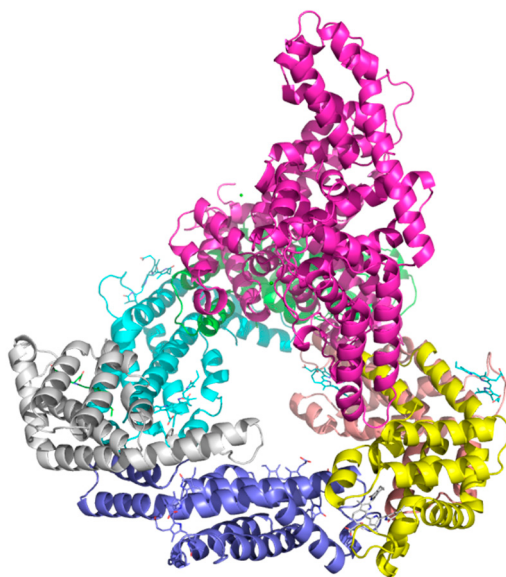

**Figure S4.** One example model between BSA and trimer of C-phycocyanin.

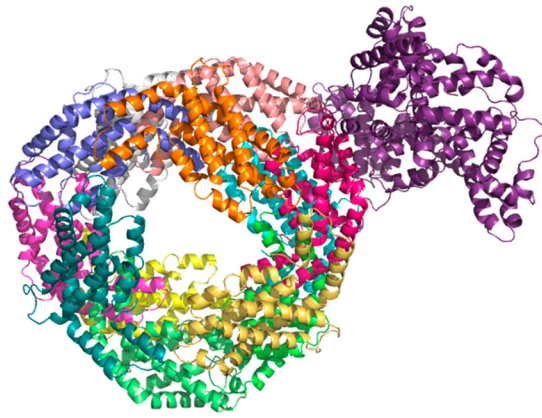

**Figure S5.** One example model between BSA and hexamer of C-phycocyanin.
